# Supplementary material
Source: PubMed Central journal article supplement (PMC2872029)
Supplement: NIHMS177069-supplement-01.pdf [file NIHMS177069-supplement-01.pdf]

# Supplemental Figure S1

**A**

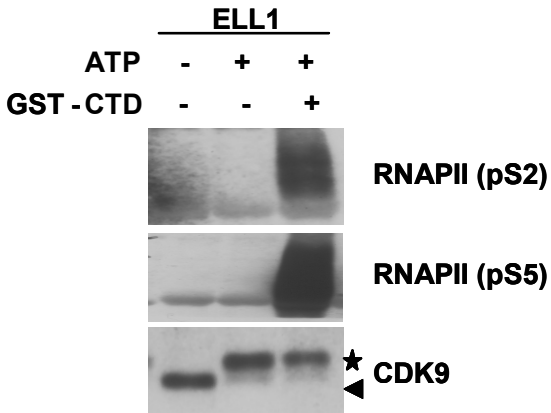

**B**

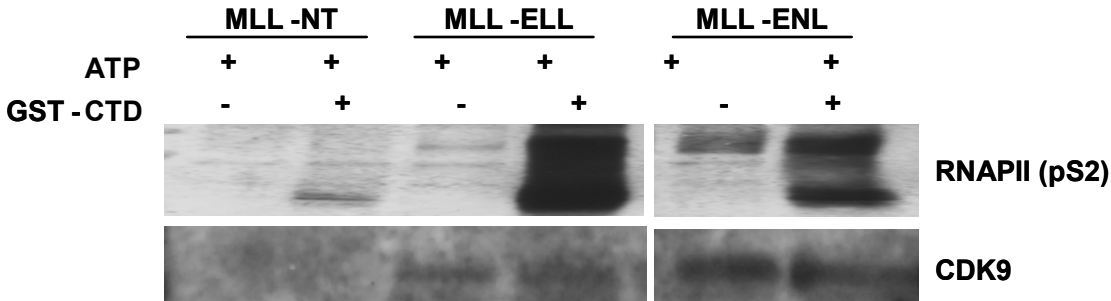

# Supplemental Figure S2

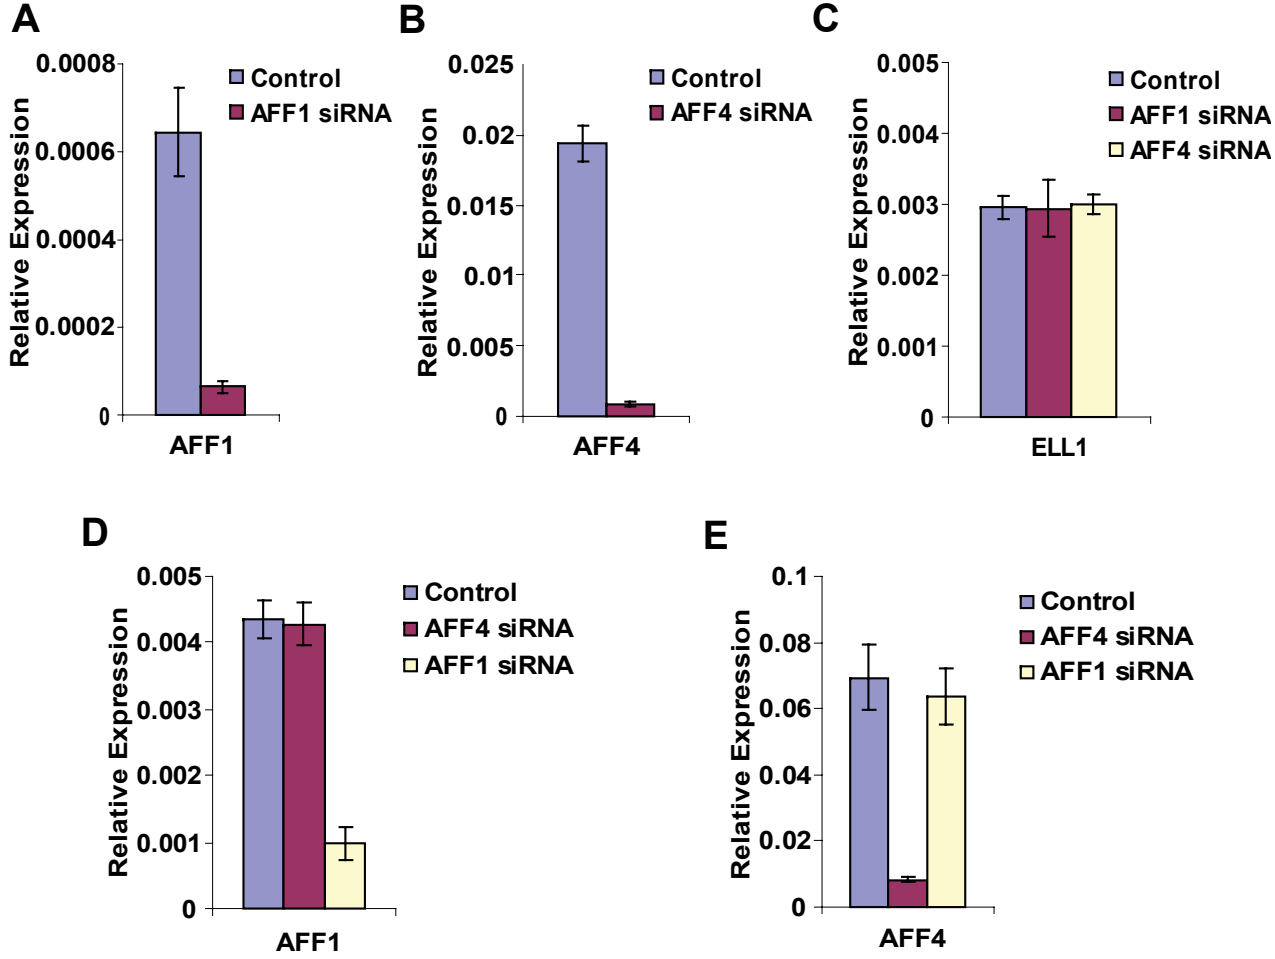

# Supplemental Figure S3

A

**AFF9/ENL Binding Region**

|                       |       |                  |       |   |            |       |
|-----------------------|-------|------------------|-------|---|------------|-------|
| dAFF4_D. melanogaster | EAR T | TTPH L T S       | VCK L | D | LSK E      | SR ER |
| XP_698757_D. rerio    | PTI   | PHRGLK L         | VVR L | D | LCL L      | GR VP |
| AFF1_H. sapiens       | PLR   | DTPPPQ S         | VVK L | T | LDL L      | SR IP |
| AFF1_M. musculus      | PLR   | DS PPPTS         | VVK L | T | LDL L      | TR IP |
| AFF1_G. gallus        | FVR   | DV PGNPS L       | VVR L | D | LPL L      | SR VP |
| AFF4_H. sapiens       | PLS   | EP DDR Y P L     | VK L  | D | LN L L     | TR IP |
| AFF4_M. musculus      | PLS   | EP DDR Y P L     | VK L  | D | LN L L     | TR IP |
| AFF4_G. gallus        | PLS   | DP DERY P L      | VK L  | D | DLS XXX L  | SR IP |
| AFF4_M. domestica     | PLS   | DP DDR Y P L XXX | VK L  | D | LS L L     | SR IP |
| AFF4_D. novemcinctus  | PLS   | EP DDR Y P L     | VK L  | D | LN L L     | TR IP |
| AFF4_R. ferrumequinum | PLS   | EP DDR Y P L     | VK L  | D | XXX LN L L | TR IP |

B

**AFF1 C-terminal Homology Domain**

|                       |                                                    |                            |                                              |                         |                               |
|-----------------------|----------------------------------------------------|----------------------------|----------------------------------------------|-------------------------|-------------------------------|
| dAFF4_D. melanogaster | -----DDPRKNNQFLQFAI-----NRKHAADLE-----RISFNQVTLTYL | DAVY Y L T L T A D A M E R | -----CSS-----E D A I N T M Y K D T I S L I L | K F I S T K E R P Y Q Q | -----O S                      |
| XP_698757_D. rerio    | -----TVPLSIVSHHAEYYMHFAK-----RIKHRADAMVGOV         | DKL G K A V N Y V          | DAAL S F M E C G K A M E E                   | G-----P L E             | S K S P Y T M Y A E T V E L L |
| AFF1_H. sapiens       | -----OVKE-DKQO-ADLHMRFAK-----KMKOKALM-----DNRVGA   | K F K Y L                  | DAVLS F E C G I L E S                        | E-----S Q S             | S K S A Y S Y S E T V D L L   |
| AFF1_M. musculus      | -----S-DRQO-ADFHMKFAK-----KIKCKAATM-----VAKAG      | A F K Y L                  | DAVLS F E C G M S E S                        | -----E S S              | A K S A V A Y S E T V D L L   |
| AFF1_G. gallus        | -----QIKF-ERCHLSSEYYLFAK-----KMKHEADAMXXXXM        | D K T G A P Q Y L          | DAAL S F V E Y G M A L E S                   | N-----A V A             | P K P A Y S T A D T I D L L   |
| AFF4_H. sapiens       | -----KLVFEDDRNYSADHYLQFAK-----KIKHNAADAL           | S R R F E K A V Y Y L      | DAVVS F E C G N A L E K                      | N-----A Q E             | S K S P E P M Y S E T V D L L |
| AFF4_M. musculus      | -----KLVFEDDRNYSADHYLQFAK-----KIKHNAADAL           | S R R F E K A V Y Y L      | DAVVS F E C G N A L E K                      | N-----A Q E             | S K S P E P M Y S E T V D L L |
| AFF4_G. gallus        | -----KLVFEDDRNYSADHYLQFAK-----KIKHNAADAL           | S R R F E K A V Y Y L      | DAVVS F E C G N A L E K                      | N-----A Q E             | S K S P E P M Y S E T V D L L |
| AFF4_M. domestica     | -----KLVFEDDRNYSADHYLQFAK-----KIKHNAADAL           | S R R F E K A V Y Y L      | DAVVS F E C G N A L E K                      | N-----A Q E             | S K S P E P M Y S E T V D L L |
| AFF4_D. novemcinctus  | -----KLVFEDDRNYSADHYLQFAK-----KIKHNAADAL           | S R R F E K A V Y Y L      | DAVVS F E C G N A L E K                      | N-----A Q E             | S K S P E P M Y S E T V D L L |
| AFF4_R. ferrumequinum | -----KLVFEDDRNYSADHYLQFAK-----KIKHNAADAL           | S R R F E K A V Y Y L      | DAVVS F E C G N A L E K                      | N-----A Q E             | S K S P E P M Y S E T V D L L |

**SP-Rich Region**

|                       |                                                             |                                    |                   |                    |                              |
|-----------------------|-------------------------------------------------------------|------------------------------------|-------------------|--------------------|------------------------------|
| dAFF4_D. melanogaster | T I N I Q H E T H N K V A L T S L R C O S L Y L R F K L K K | -----K-----DCR-----A I I N S T D F | FRVGRGD           | -----I A N G N T P | -----S S T S P S N S V G S Q |
| XP_698757_D. rerio    | AS-----QEDKQLAVTCFRCLALTYAOMFRLKK-----D-----HAI             | K Y S K V T L D Y                  | FK-SSPK           | -----G P H N P P T | -----R N D S G R G T I       |
| AFF1_H. sapiens       | AP-----TQEKIFAVLCMRCOSLHMAFERCKK-----D-----IAL              | K Y S R T L N K H                  | FK-SSSK           | -----V A O A P S P | -----C I A                   |
| AFF1_M. musculus      | -----N-TMFAQEKIFAVLCMRCOSLHMAFERCKK-----D-----TVM           | K Y S R T L S E H                  | FK-STSK           | -----V A O A P S P | -----C T A R S T G V P       |
| AFF1_G. gallus        | ASXXXXSHHEHVFAVLCMRCOSLHMAFERVYKR-----D-----TAI             | K Y S R L N D H                    | FK-SSSR           | -----V T O A P S P | -----C V A                   |
| AFF4_H. sapiens       | AT-----AADKRLTVLCMRCOSLYLRFK L K K                          | -----E-----NAT                     | K Y S K T L T E H | L K-N S Y N        | -----N S O A P S P           |
| AFF4_M. musculus      | AT-----AADKRLTVLCMRCOSLYLRFK L K K                          | -----E-----NAT                     | K Y S K T L T E H | L K-N S Y N        | -----N S O A P S P           |
| AFF4_G. gallus        | AT-----AADKRLAVLCMRCOSLYLRFK L K K                          | ESXXXXAL                           | K Y S K T L T E H | L K-N S Y N        | -----N S O A P S P           |
| AFF4_M. domestica     | AT-----SADKRLAVLCMRCOSLYLRFK L K K                          | -----E-----NAT                     | K Y S K T L T E H | L K-N S Y N        | -----N S O A P S P           |
| AFF4_D. novemcinctus  | AT-----VADKRLTVLCMRCOSLYLRFK L K K                          | -----E-----NAT                     | K Y S K T L T E H | L K-N S Y N        | -----N S O A P S P           |
| AFF4_R. ferrumequinum | AT-----AADKRLTVLCMRCOSLYLRFK L K K                          | ESXXXXAT                           | K Y S K T L T E H | L K-N S Y N        | -----N S O A P S P           |

**SP-Rich Region**

|                       |                           |                                                       |                                           |                       |
|-----------------------|---------------------------|-------------------------------------------------------|-------------------------------------------|-----------------------|
| dAFF4_D. melanogaster | G G S N T P               | -----P G R I V P E I H N Y L C K Q N E F L S          | -----Y L N S A H E I L                    | W D A E R L V         |
| XP_698757_D. rerio    | I G K S P S               | -----T V I S I P R I H Q M A A N H L N I T N          | -----S V L Y S Y E Y                      | W E V A D             |
| AFF1_H. sapiens       | Q S S A G -S V            | -----A T I S T P V T I Q N T S S Y V T I T S          | -----H V L T A F D I                      | W E O A E             |
| AFF1_M. musculus      | S S A G S S M G S V G V T | -----A T V S T P V S T Q N T S S Y V T I T S          | -----H V L T A F S L                      | W E O A E             |
| AFF1_G. gallus        | Q G S N G S N C           | -----N S I G S V T I P S I T S S Y V N I T S          | -----Y V L Y A Y N I L                    | W E I A L X X X X A   |
| AFF4_H. sapiens       | S G A S S A S A           | S-----G-----S S V T I P O K I H Q M A A S Y V Q V T S | N-----F L Y A T E I L                     | W D O A E             |
| AFF4_M. musculus      | S G S S A S A             | S-----G-----S S V T I P O K I H Q M A A S Y V Q V T S | N-----F L Y A T E I L                     | W D O A E             |
| AFF4_G. gallus        | S G T A N P S G           | S G X X X X                                           | S S V T I P O R I H Q M A A S Y V Q V T S | N-----F L Y A T E I L |
| AFF4_M. domestica     | S G A S S T X X           | X X S G S S                                           | S S V T I P O K I H Q M A A N Y V Q V T S | N-----F L Y A T E I L |
| AFF4_D. novemcinctus  | S G A S S A S A           | S-----G-----S S V T I P O K I H Q M A A S Y V Q V T S | N-----F L Y A T E I L                     | W D O A E             |
| AFF4_R. ferrumequinum | S G A S S A S A           | S X X X X G                                           | S S V T I P R I H H M A A S Y V Q V T S   | N-----F L Y A T E I L |

**SP-Rich Region**

|                       |                                                              |                                                            |                |
|-----------------------|--------------------------------------------------------------|------------------------------------------------------------|----------------|
| dAFF4_D. melanogaster | -----R I G N H I D H I R E I D H E N G P T L H S T           | -----M-----H E V F R Y V A C L K T R D A V S H P           | -----H H O S G |
| XP_698757_D. rerio    | -----L A K E N K L E N Y I N P L T G P T L H S S             | -----M-----A H V O M T R O G L W R I S A N L S             | -----          |
| AFF1_H. sapiens       | -----L T R K N K E F F A R S T N V C T A L N S S             | -----I-----V D I V H Y T R O G F Q Q G E L T K T P         | -----          |
| AFF1_M. musculus      | -----L T R K N K E F F A O S T K V R V A L N S S             | -----I-----V D I V H Y T R O G L O R E K Q S P K G P       | -----          |
| AFF1_G. gallus        | -----L S K N N K E F F A E S T A V C P A L T S S             | -----M-----A E M V H Y T R O G L H W R L N T S T P         | -----          |
| AFF4_H. sapiens       | -----L S K E O K E F F A E D K V M G P I F N A S             | -----I M-----T D I L V R Y T R O G L H W R L Q D A K L I S | -----          |
| AFF4_M. musculus      | -----L S K E O K E F F A E D K V M G P I F N A S             | -----I M-----T D I L A R Y T R O G L H W R L Q D A K L I S | -----          |
| AFF4_G. gallus        | -----L S K E O K E F F A E D K A M G P V F N S S I X X X X   | -----I M-----T D I L V R Y T R O G L H W R L D A K I S     | -----          |
| AFF4_M. domestica     | -----L I K E O K E F F A E D K V M G P I F X X X X N S S I M | -----I M-----T D I L V R Y T R O G L H W R L D A K I S     | -----          |
| AFF4_D. novemcinctus  | -----L S K E O K E F F A E D K V M G P I F N A S             | -----I M-----T D I L V R Y T R O G L H W R L Q D A K L I S | -----          |
| AFF4_R. ferrumequinum | -----L S K E O K E F F A E D K V M G P I F N A S X X X X I M | -----I M-----T D I L V R Y T R O G L H W R L Q D A K I S   | -----          |

# Supplemental Figure S4

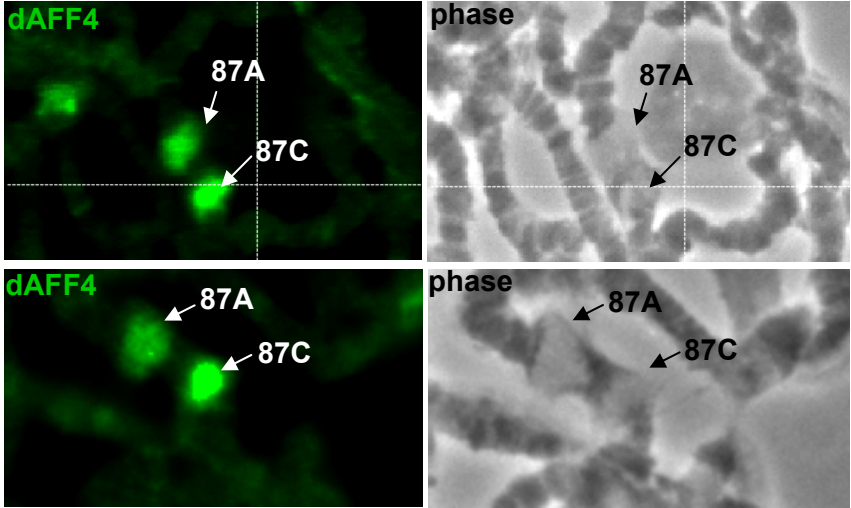

# Supplemental Figure S5

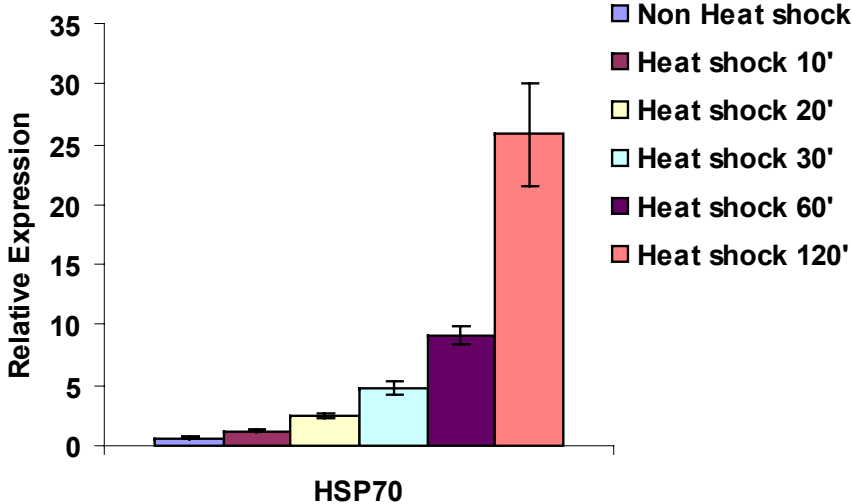

# Supplemental Figure S6

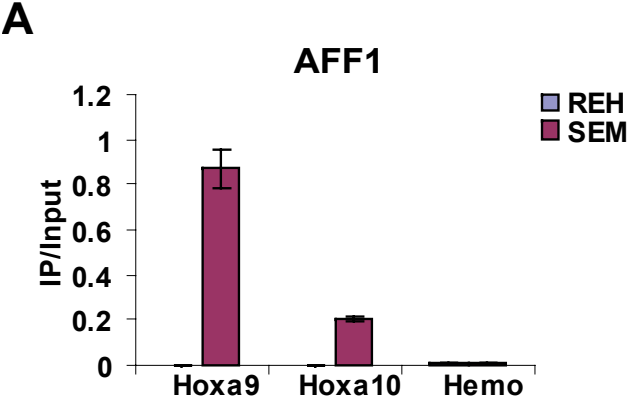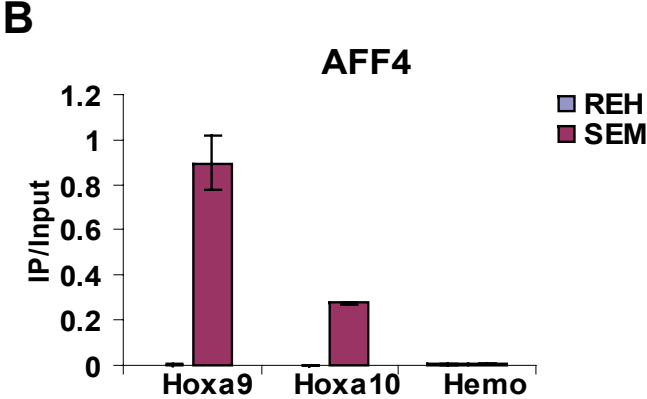

# Supplemental Table 1

| <b>Protein</b>       | <b>MLL-NT<br/>dNSAF<br/>AVG</b> | <b>MLL-<br/>ELL1<br/>dNSAF<br/>AVG</b> | <b>MLL-<br/>AFF1<br/>dNSAF<br/>AVG</b> | <b>MLL-AF9<br/>dNSAF<br/>AVG</b> | <b>MLL-ENL<br/>dNSAF<br/>AVG</b> |
|----------------------|---------------------------------|----------------------------------------|----------------------------------------|----------------------------------|----------------------------------|
| <b>MLL-NT</b>        | 0.050949                        | 0                                      | 0                                      | 0                                | 0                                |
| <b>MLL-<br/>ELL1</b> | 0                               | 0.084755                               | 0                                      | 0                                | 0                                |
| <b>MLL-<br/>AFF1</b> | 0                               | 0                                      | 0.012444                               | 0                                | 0                                |
| <b>MLL-<br/>AF9</b>  | 0                               | 0                                      | 0                                      | 0.051766                         | 0                                |
| <b>MLL-<br/>ENL</b>  | 0                               | 0                                      | 0                                      | 0                                | 0.06576                          |
| <b>Menin</b>         | 0.21546                         | 0.088819                               | 0.04613                                | 0.053286                         | 0.151354                         |
| <b>LEDGF</b>         | 0.000885                        | 0.000533                               | 0.000192                               | 0.001115                         | 0.001327                         |
| <b>AFF4</b>          | 0                               | 0.001971                               | 0.000831                               | 0.000593                         | 0.000127                         |
| <b>Dot1L</b>         | 0                               | 0                                      | 0                                      | 0.001484                         | 0.000048                         |

## Supplemental Table 2

| <b>Protein</b>     | <b>ELL1<br/>dNSAF<br/>AVG</b> | <b>ELL2<br/>dNSAF<br/>AVG</b> | <b>ELL3<br/>dNSAF<br/>AVG</b> | <b>AFF4<br/>dNSAF<br/>AVG</b> |
|--------------------|-------------------------------|-------------------------------|-------------------------------|-------------------------------|
| <b>ELL1</b>        | 0.185148                      | 0.000385                      | 0.003368                      | 0.006379                      |
| <b>ELL2</b>        | 0.000542                      | 0.054255                      | 0                             | 0.004369                      |
| <b>ELL3</b>        | 0                             | 0                             | 0.111228                      | 0.006603                      |
| <b>AFF4</b>        | 0.004663                      | 0.006674                      | 0.015106                      | 0.03917                       |
| <b>AFF1</b>        | 0.001422                      | 0.001296                      | 0.003659                      | 0.00077                       |
| <b>AF9</b>         | 0.001334                      | 0.00052                       | 0.002346                      | 0.005846                      |
| <b>ENL</b>         | 0.001637                      | 0.000988                      | 0.003198                      | 0.011151                      |
| <b>CDK9</b>        | 0.005979                      | 0.002635                      | 0.007835                      | 0.029597                      |
| <b>CCNT1</b>       | 0.00124                       | 0.000513                      | 0.001316                      | 0.021903                      |
| <b>Cyclin T 2a</b> | 0.000261                      | 0.000071                      | 0.001236                      | 0.003648                      |
| <b>Cyclin T 2b</b> | 0.000237                      | 0.000065                      | 0.001122                      | 0.003313                      |
| <b>EAF1</b>        | 0                             | 0.072906                      | 0.02451                       | 0.000652                      |
| <b>EAF2</b>        | 0                             | 0.002226                      | 0.002792                      | 0                             |
